# Supplementary material for: Integrated Pathway-Based Approach Identifies Association between Genomic Regions at CTCF and CACNB2 and Schizophrenia
Source: PLoS Genet. 2014 Jun 5;10(6):e1004345. doi: 10.1371/journal.pgen.1004345 (PMC4046913; doi:10.1371/journal.pgen.1004345)
Supplement: Table S5 — Potential functional consequences of CTCF associated SNPs. (XLS) [file pgen.1004345.s008.xls]

## Sheet: Sheet1
	P-value (GT)	in LD with	RSquared	MAF	Gene Name	Variation consequence types	Polyphen-2 prediction	Polyphen-2 score	SIFT prediction	RegulomeDB score	eQTL/Gene affected	Motifs	Chromatin_Structure	Bound Protein	Comment
rs8056260	3.022323e-04	rs9972635	1	0.017	ATP6V0D1	INTRONIC				1f	ATP6V0D1		FAIRE DNase-seq		Likely to affect binding and linked to expression of a gene target
rs9922085	3.022323e-04	rs9972635	1	0.017	LRRC36	NON_SYNONYMOUS_CODING	benign	0	tolerated	2b		XBP-1 CLOCK:BMAL	FAIRE DNase-seq	AR FOXA1 USF1 CDX2 HNF4A TRIM28 USF2 TCF4 HDAC2 SP1 BHLHE40	Likely to affect binding
rs9922476	3.022323e-04	rs9972635	1	0.017	ATP6V0D1	INTRONIC				4			FAIRE DNase-seq	IKZF1	Minimal binding evidence
rs45483293	3.022323e-04	rs9972635	1	0.017	N/A	N/A				4			DNase-seq	CTCF	Minimal binding evidence
rs9972635	3.022323e-04	genotyped	1	0.017	RLTPR	SPLICE_SITE INTRONIC				5		Lyf-1	DNase-seq		Minimal binding evidence
rs35356834	3.022323e-04	rs9972635	1	0.017	PARD6A	NON_SYNONYMOUS_CODING	benign	0.001	tolerated	5			DNase-seq		Minimal binding evidence
rs117696061	3.022323e-04	rs9972635	1	0.017	N/A	N/A				5			DNase-seq		Minimal binding evidence
rs16957358	3.022323e-04	rs9972635	1	0.017	LRRC36	INTRONIC				5			FAIRE DNase-seq		Minimal binding evidence
rs16942883	3.022323e-04	rs9972635	1	0.017	LRRC36	INTRONIC				5		Sox1	DNase-seq		Minimal binding evidence
rs116856853	3.022323e-04	rs9972635	1	0.017	N/A	N/A				5		MIF-1 COUPTF RFX1	FAIRE DNase-seq		Minimal binding evidence
rs9939328	3.022323e-04	rs9972635	1	0.017	LRRC36	INTRONIC				5		ER PPARG::RXRA	DNase-seq		Minimal binding evidence
rs76160073	3.022323e-04	rs9972635	1	0.017	N/A	N/A				6		Mtf1 Zfp105 FOXP1			Minimal binding evidence
rs117713176	3.022323e-04	rs9972635	1	0.017	N/A	N/A				6		Nkx3-1			Minimal binding evidence
rs8052852	3.022323e-04	rs9972635	1	0.017	LRRC36	INTRONIC				6		lhx6.1 POU3F2			Minimal binding evidence
rs114329216	3.022323e-04	rs9972635	1	0.017	N/A	N/A				6		Tcfap2e Elf3			Minimal binding evidence
rs8058638	3.022323e-04	rs9972635	1	0.017	N/A	INTERGENIC				7					No Data
rs7205526	3.022323e-04	rs9972635	1	0.017	LRRC36	INTRONIC				7					No Data
rs9930454	3.022323e-04	rs9972635	1	0.017	LRRC36	INTRONIC				7					No Data
rs74845115	3.022323e-04	rs9972635	1	0.017	N/A	N/A				7					No Data
rs17686899	4.209072e-02	rs6499137	0.881	0.075	CTCF	INTRONIC				1f	RLTPR DUS2L		DNase-seq		Likely to affect binding and linked to expression of a gene target
rs9924509	4.209072e-02	rs6499137	0.881	0.075	FAM65A	INTRONIC				1f	RLTPR		FAIRE DNase-seq		Likely to affect binding and linked to expression of a gene target
rs61744916	4.209072e-02	rs6499137	0.881	0.075	N/A	N/A	no data		tolerated	2b		KROX SP4 SP1:SP3 HIC1 Zif268 Sp4 Sp1 SP1 Egr1	FAIRE DNase-seq	CTCF	Likely to affect binding
rs77463232	4.209072e-02	rs6499137	0.881	0.075	N/A	N/A				3a		Zscan4	DNase-seq	CTCF	Less likely to affect binding
rs56402515	4.209072e-02	rs6499137	0.881	0.075	N/A	N/A				4			FAIRE DNase-seq	POLR2A	Minimal binding evidence
rs78111165	4.209072e-02	rs6499137	0.881	0.075	N/A	N/A				4			FAIRE DNase-seq	POLR2A	Minimal binding evidence
rs113729483	4.209072e-02	rs6499137	0.881	0.075	N/A	N/A				4			FAIRE DNase-seq	GABPA IKZF1 POLR2A	Minimal binding evidence
rs75648422	4.209072e-02	rs6499137	0.881	0.075	N/A	N/A				4			DNase-seq	GATA1 TAL1 POLR2A	Minimal binding evidence
rs75914405	4.209072e-02	rs6499137	0.867	0.058	N/A	N/A				4			FAIRE DNase-seq	CEBPB SPI1 TCF4	Minimal binding evidence
rs79261677	4.209072e-02	rs6499137	0.881	0.075	N/A	N/A				5		Sox12 MEF-2 Tbp	DNase-seq		Minimal binding evidence
rs113664189	4.209072e-02	rs6499137	0.881	0.075	N/A	N/A				5				IKZF1	Minimal binding evidence
rs74689917	4.209072e-02	rs6499137	0.881	0.075	N/A	N/A				5				TAL1	Minimal binding evidence
rs6499137	4.209072e-02	genotyped	1	0.067	CTCF	3PRIME_UTR	benign	0.001	no data	6	RLTPR				Minimal binding evidence
rs111294469	4.209072e-02	rs6499137	1	0.067	N/A	N/A				6		Tcfcp2l1			Minimal binding evidence
rs75962241	4.209072e-02	rs6499137	1	0.067	N/A	N/A				6		IRF-7 MRF-2			Minimal binding evidence
rs118116213	4.209072e-02	rs6499137	0.881	0.075	N/A	N/A				6		C/EBPdelta			Minimal binding evidence
rs28421035	4.209072e-02	rs6499137	0.881	0.075	CTCF	INTRONIC				6	RLTPR	FOXO4			Minimal binding evidence
rs77375566	4.209072e-02	rs6499137	0.881	0.075	N/A	N/A				6		Irf3 MIF-1			Minimal binding evidence
rs112726101	4.209072e-02	rs6499137	0.881	0.075	N/A	N/A				6		Tcf3			Minimal binding evidence
rs28491096	4.209072e-02	rs6499137	0.881	0.075	N/A	INTERGENIC				6		Tcfap2e FOXM1 FOXP1			Minimal binding evidence
rs6499132	4.209072e-02	rs6499137	0.881	0.075	CTCF	INTRONIC				7					No Data
rs75707638	4.209072e-02	rs6499137	0.881	0.075	N/A	N/A				7					No Data
rs13334205	8.134215e-04	rs7191281	1	0.1	N/A	DOWNSTREAM				4			FAIRE DNase-seq	EBF1 TCF12 POLR2A	Minimal binding evidence
rs7203742	8.134215e-04	rs7191281	1	0.1	CTCF	INTRONIC				5		Arid5a	DNase-seq		Minimal binding evidence
rs9934328	8.134215e-04	rs7191281	1	0.1	FAM65A	INTRONIC				5			FAIRE DNase-seq		Minimal binding evidence
rs16957489	8.134215e-04	rs7191281	1	0.1	CTCF	INTRONIC				6		Mafb P50:RELA-P65 Mafk			Minimal binding evidence
rs60626639	8.134215e-04	rs7191281	1	0.1	N/A	N/A				6		Dbx1 Tlx2 Zfp187 HNF1			Minimal binding evidence
rs7191281	8.134215e-04	genotyped	1	0.1	CTCF	INTRONIC				7					No Data
rs28711261	8.134215e-04	rs7191281	1	0.1	CTCF	INTRONIC				7					No Data
rs6979	8.25618e-03	genotyped	1	0.458	RLTPR	NON_SYNONYMOUS_CODING	benign	0	tolerated	5		deltaEF1 TGIF	FAIRE DNase-seq		Minimal binding evidence
